# Supplementary material for: Heparan sulfate deficiency leads to Peters anomaly in mice by disturbing neural crest TGF-β2 signaling
Source: JCI journal article supplement (doi:10.1172/jci38519), 2009-06-08
Supplement: sd1 [file 1]

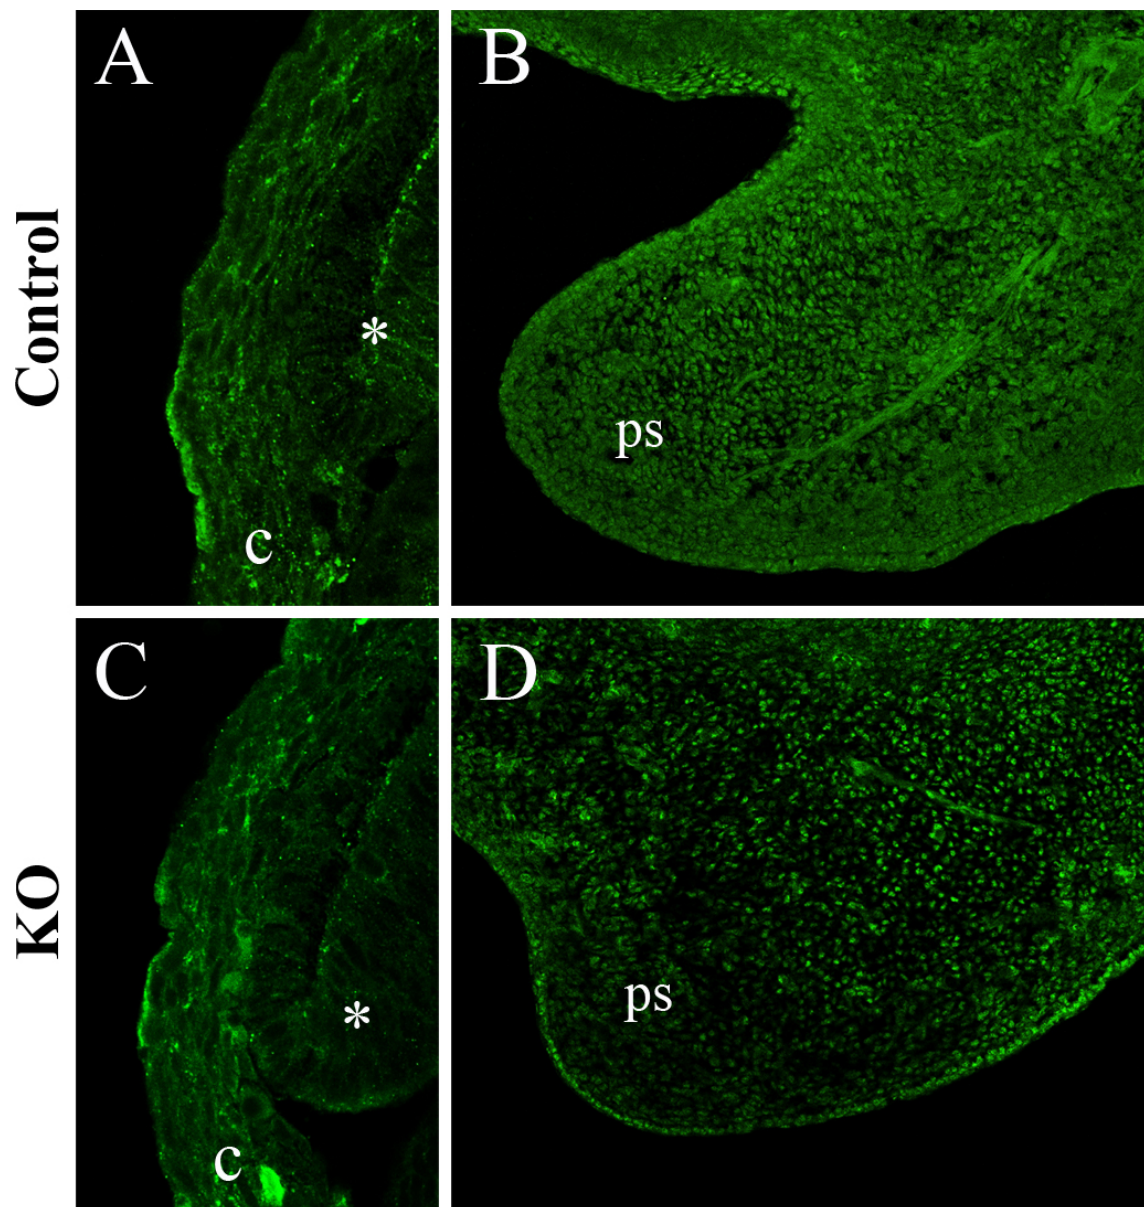

**Supplemental Figure 1:** The downstream signaling of HS-binding morphogens in *Ext1*-disrupted neural crest cells in the embryo at E13.5. *Wnt1-Cre;Ext1<sup>flox/flox</sup>* embryos (A) and control embryos (C) showed no differentiation of the phosphorylated Erk1/2 immunoreactivity in the developing anterior segment. As compared to the control embryos (B), the phosphorylation of Smad2 was significantly decreased in the palatal

shelf of the mutant embryos (D). c, cornea; KO, *Wnt1-Cre;Ext1<sup>flox/flox</sup>*; ps, palatal shelf;

\*, presumptive ciliary body.
